# Supplementary material
Source: PubMed Central journal article supplement (PMC3948561)
Supplement: tjp0592-1025-sd1.pdf [file tjp0592-1025-sd1.pdf]

## Online supplement

### Effects of natriuretic peptides on electrical conduction in the sinoatrial node and atrial myocardium of the heart

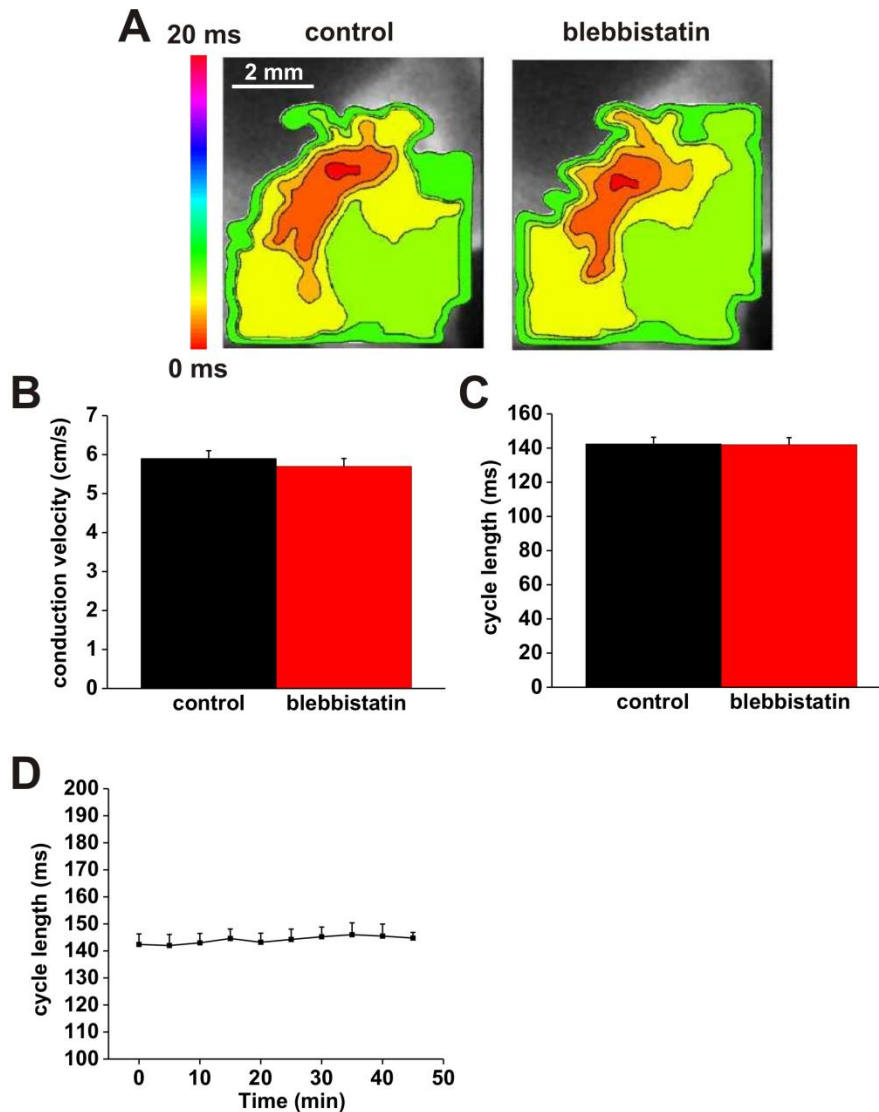

**Supplemental Figure 1: Effects of blebbistatin on activation pattern and electrical conduction.** A, Representative color maps showing patterns of activation in control conditions and after application of blebbistatin (10  $\mu$ M). B, Summary of the effects of blebbistatin on SAN conduction velocity. C, Summary of the effects of blebbistatin on cycle length. D, Summary of the cycle length, in the presence of blebbistatin (applied at time 0 min), measured every five minutes for 45 min. Blebbistatin had no effect on activation patterns, location of initial exit site, SAN conduction velocity or cycle length. Atrial preparation cycle length was very stable for at least 45 min. Data analyzed by one way ANOVA with Tukey's posthoc test;  $n=5$  hearts.
